# Supplementary material for: Osteocyte regulation of orthodontic force-mediated tooth movement via RANKL expression
Source: PubMed Central journal article supplement (PMC5562866; doi:10.1038/s41598-017-09326-7), 2017-08-18

**SUPPLEMENTARY INFORMATION**

**Osteocyte regulation of orthodontic force-mediated tooth movement *via* RANKL  
expression**

**Ayumi Shoji-Matsunaga<sup>1,2</sup>, Takehito Ono<sup>1</sup>, Mikihiro Hayashi<sup>1</sup>, Hiroshi**

**Takayanagi<sup>3</sup>, Keiji Moriyama<sup>2</sup>, Tomoki Nakashima<sup>1,4,5</sup>**

Correspondence and requests for materials should be addressed to T.N (email:

naka.csi@tmd.ac.jp)

## **Supplementary figure legends**

**Supplementary Figure 1. Osteoblastic bone formation during orthodontic tooth movement.** (a) Micro-CT images of sagittal sections of the maxillary bones in wild-type mice after spring insertion (0, 4, 8 and 12 days). (b) Osteoblast surface per alveolar bone surface (n = 3 per each time point). Scale bar: 1 mm. Error bars, means  $\pm$  s.e.m.; \*\*\*\*P < 0.0001; NS, not significant.

**Supplementary Figure 2. Osteoblastic bone formation in osteocyte-specific RANKL deficient mice.** Osteoblast surface per alveolar bone surface in each group (n = 3–4). The dotted lines denote the osteoblast surface. Scale bar: 50  $\mu$ m. Error bars, means  $\pm$  s.e.m.; \*\*\*\*P < 0.0001.

**Supplementary Figure 3. Schematic diagram of orthodontic tooth movement.** Osteocyte-derived RANKL regulates osteoclastogenesis during orthodontic tooth movement.

**a**

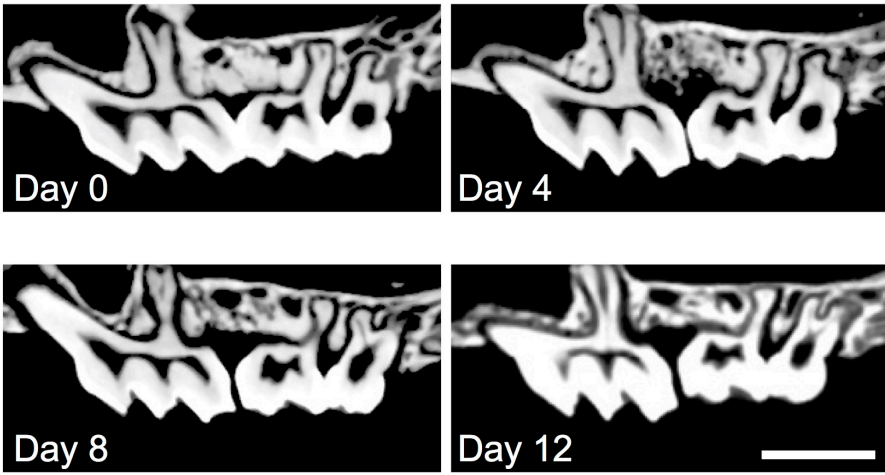

**b**

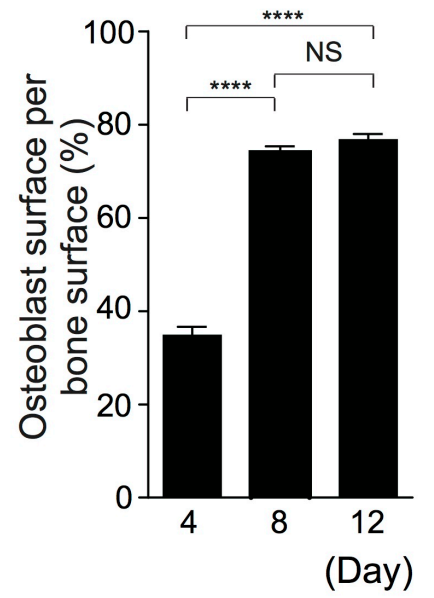

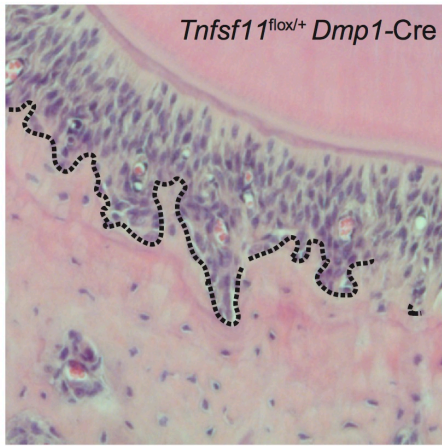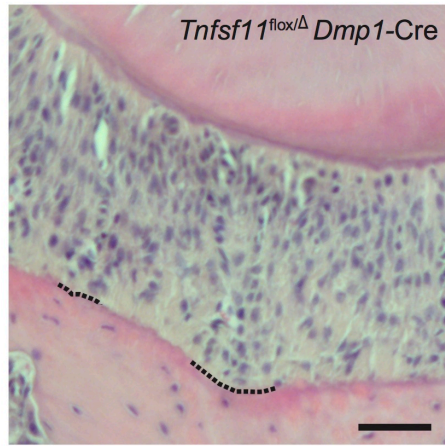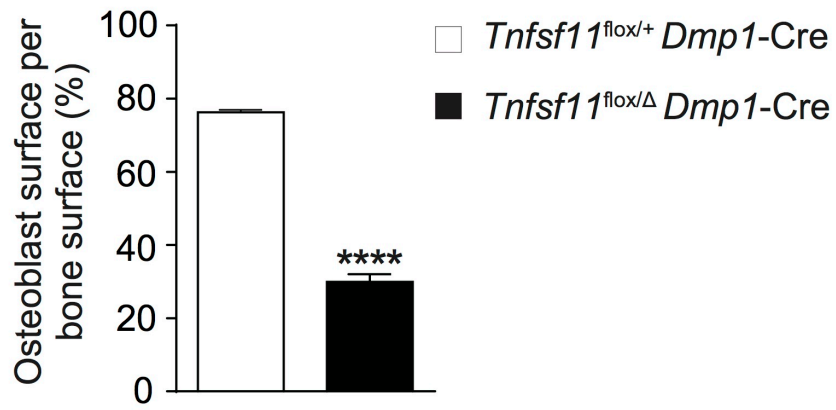

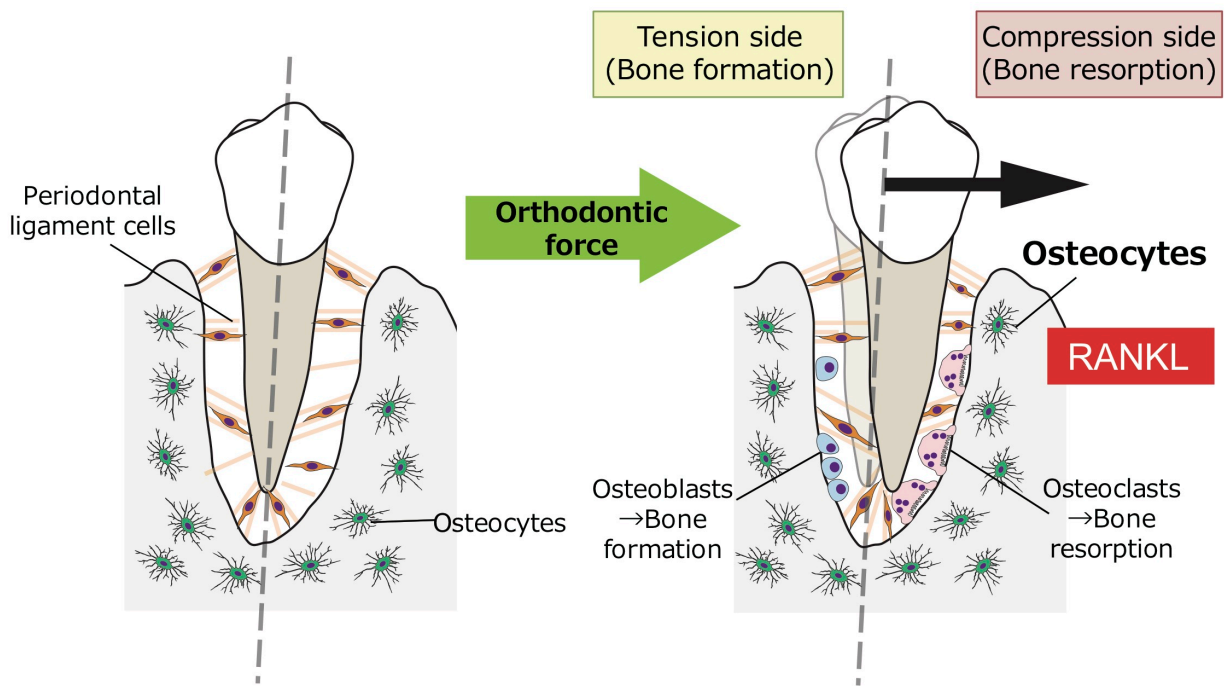

Supplement: 41598_2017_9326_MOESM1_ESM.pdf [file 41598_2017_9326_MOESM1_ESM.pdf]
